# Supplementary material for: Examination of the skeletal proteome of the brittle star Ophiocoma wendtii reveals overall conservation of proteins but variation in spicule matrix proteins
Source: PubMed Central journal article supplement (PMC4336488; doi:10.1186/s12953-015-0064-7), 2015-02-07
Supplement: 12953_2015_64_MOESM3_ESM.pdf [file 12953_2015_64_MOESM3_ESM.pdf]

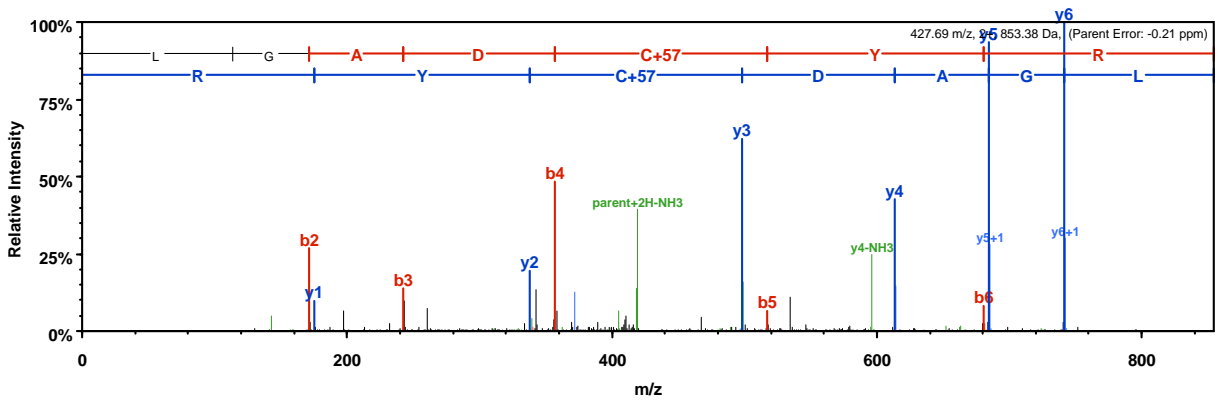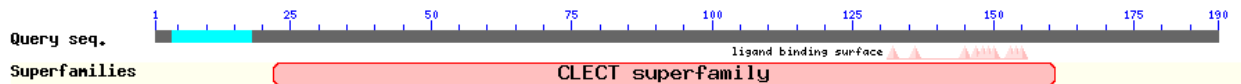

MKILSLLVAAGLLALANAHGGCPPLWTK**LGADCYRYFGFPRPMR**  
 IAERVCAQFTSCSDAGTTAVAHLASIANGAQNTYLYNLIESVAPELP  
 PAPVWIGLNDIVREGDFRWPDGTQYVFKNWERGHPNNQGNS  
 DCVAMPGERPGAGWVSMNCMEEFAYICKMPADVSQEVPAQPA  
 PYYWDSYPELYTNYYY

Additional file: SM 22 sequence. A. Example spectra identifying LUPK as encoding a protein occluded in the *O. wendtii* skeleton. B. The predicted domain structure. C: The open reading frame of LUPK with amino acid sequences identified using MS/MS in bold. The amino acid sequences deduced from a short transcript that contain the original peptide are italicized. The original peptide is shown in the spectra and underlined. All other peptide matches shown in bold were found after obtaining the complete coding sequence and re-analysis with the peptide data.
