# Supplementary material for: Examination of the skeletal proteome of the brittle star Ophiocoma wendtii reveals overall conservation of proteins but variation in spicule matrix proteins
Source: PubMed Central journal article supplement (PMC4336488; doi:10.1186/s12953-015-0064-7), 2015-02-07
Supplement: 12953_2015_64_MOESM6_ESM.pdf [file 12953_2015_64_MOESM6_ESM.pdf]

# Gblocks 0.91b Results

Processed file: **ClectinNov18.v2.fas**

Number of sequences: **20**

Alignment assumed to be: **Protein**

New number of positions: **55** (selected positions are underlined in blue)

|                 | 10                                                                                         | 20                                                                                                                    | 30                                       | 40                                           | 50                                                                                                                                    | 60                                                                                                                                    |                                                                                                                            |
|-----------------|--------------------------------------------------------------------------------------------|-----------------------------------------------------------------------------------------------------------------------|------------------------------------------|----------------------------------------------|---------------------------------------------------------------------------------------------------------------------------------------|---------------------------------------------------------------------------------------------------------------------------------------|----------------------------------------------------------------------------------------------------------------------------|
| SpEchinoidin-L1 | <u>CPPL</u> <u>WT</u> AFQNN <u>CYRY</u> F                                                  | SVKNITWLG                                                                                                             | <u>AEMH</u> <u>CSG</u> F                 | SVPCSDVDSTINL                                | <u>GHL</u> <u>TS</u>                                                                                                                  | IHSKEKMTF                                                                                                                             |                                                                                                                            |
| SpEchinoidin-L  | <u>CPPL</u> <u>WT</u> AFQNN <u>CYRY</u> F                                                  | SVKNITWLG                                                                                                             | <u>AEMH</u> <u>CSG</u> F                 | SVPCSDVDSTISL                                | <u>GHL</u> <u>TS</u>                                                                                                                  | IHSKEEMTF                                                                                                                             |                                                                                                                            |
| SpEchinoidin    | <u>CPKL</u> <u>WT</u> GFRNH <u>CYRF</u> F                                                  | SHELTWLA                                                                                                              | <u>AENF</u> <u>CRS</u> F                 | TVPSWGEVTRTNS                                | <u>GHL</u> <u>VS</u>                                                                                                                  | IHSQPEQDF                                                                                                                             |                                                                                                                            |
| OwSM20          | <u>CRPL</u> <u>WT</u> RFQNN <u>CYRF</u> F                                                  | GEATTWKE                                                                                                              | <u>AESS</u> <u>CRQ</u> F                 | FV-TV-----                                   | SKP <u>GHL</u> <u>VS</u>                                                                                                              | IHSKDENDF                                                                                                                             |                                                                                                                            |
| Sp-clect-p      | <u>CP</u> <u>TF</u> <u>WT</u> GYGNY <u>CYRY</u> F                                          | NDVKTWLE                                                                                                              | <u>AEFY</u> <u>CRT</u> F                 | FG-AG-GCMGQTGQA                              | <u>H</u> <u>LV</u> <u>S</u>                                                                                                           | IHSQDENDF                                                                                                                             |                                                                                                                            |
| OwSM21          | <u>CPPL</u> <u>WT</u> SGPKG <u>CYRY</u> F                                                  | AKARTWEA                                                                                                              | <u>ARDH</u> <u>CSG</u> F                 | FS-SC----                                    | VGNSI <u>G</u> <u>N</u> <u>LV</u> <u>S</u>                                                                                            | I <sup>+</sup> GSQAENDY                                                                                                               |                                                                                                                            |
| OwSM22          | <u>CPPL</u> <u>WT</u> KLGAD <u>CYRY</u> F                                                  | GFPRPMRI                                                                                                              | <u>AERV</u> <u>CAQ</u> F                 | FT-SC-SDAGTTAVA                              | <u>H</u> <u>L</u> <u>S</u>                                                                                                            | IANGAQN <sup>+</sup> TY                                                                                                               |                                                                                                                            |
| OwSM24          | <u>CPPL</u> <u>WT</u> HLGDS <u>CYRF</u> F                                                  | PDRLRWED                                                                                                              | <u>AKTT</u> <u>CGQ</u> F                 | FA-PC----                                    | SAEAL <u>G</u> <u>Q</u> <u>L</u> <u>V</u> <u>K</u>                                                                                    | IADAQVNEF                                                                                                                             |                                                                                                                            |
| Sp-clect-14     | <u>CI</u> <u>P</u> <u>G</u> <u>WT</u> NFGKY <u>CYK</u> <u>F</u> F                          | NQRMNWLQ                                                                                                              | <u>AQRE</u> <u>CNK</u> <u>YS</u>         | AL---NGTTPR                                  | <u>G</u> <u>Y</u> <u>L</u> <u>M</u> <u>T</u> <u>S</u> <u>K</u> <u>D</u> <u>Q</u> <u>H</u> <u>N</u> <u>N</u> <u>F</u>                  |                                                                                                                                       |                                                                                                                            |
| Spclect-13      | <u>CQ</u> <u>P</u> <u>G</u> <u>WT</u> NFGKF <u>CYK</u> <u>Y</u> <u>F</u>                   | YERLPFME                                                                                                              | <u>AQMQ</u> <u>CLS</u> F                 | FR-AS----                                    | PLAPR <u>G</u> <u>Y</u> <u>L</u> <u>I</u> <u>T</u> <u>A</u> <u>K</u> <u>D</u> <u>Q</u> <u>T</u> <u>H</u> <u>N</u> <u>R</u> <u>F</u>   |                                                                                                                                       |                                                                                                                            |
| SpSM29          | <u>CL</u> <u>P</u> <u>G</u> <u>WT</u> NFGNF <u>CYK</u> <u>Y</u> <u>I</u>                   | WQRLPYDE                                                                                                              | <u>ANMF</u> <u>CAR</u> F                 | FS-AQRPGFGMPPR                               | <u>G</u> <u>H</u> <u>L</u> <u>I</u> <u>V</u> <u>T</u> <u>K</u> <u>D</u> <u>M</u> <u>M</u> <u>H</u> <u>N</u> <u>K</u> <u>F</u>         |                                                                                                                                       |                                                                                                                            |
| SpSM50          | -----                                                                                      | MRVPYRM                                                                                                               | <u>A</u> <u>S</u> <u>E</u> <u>F</u>      | CEMVT-PC--                                   | GNGPAKM <u>G</u> <u>A</u> <u>L</u> <u>A</u> <u>S</u> <u>V</u> <u>S</u> <u>S</u> <u>P</u> <u>O</u> <u>E</u> <u>N</u> <u>M</u> <u>E</u> |                                                                                                                                       |                                                                                                                            |
| SpSM32          | <u>CP</u> <u>A</u> <u>Y</u> <u>S</u> <u>Q</u> <u>S</u> <u>G</u> <u>Q</u> <u>S</u>          | <u>CYRY</u> <u>F</u>                                                                                                  | NIPLAYQW                                 | <u>A</u> <u>S</u> <u>E</u> <u>F</u>          | CEMVT-PC--                                                                                                                            | GNGPAVM <u>G</u> <u>T</u> <u>L</u> <u>A</u> <u>A</u> <u>P</u> <u>K</u> <u>S</u> <u>P</u> <u>O</u> <u>E</u> <u>N</u> <u>M</u> <u>E</u> |                                                                                                                            |
| SpAggrecan      | <u>CP</u> <u>H</u> <u>A</u> <u>WT</u> QRNGY <u>CYRY</u> F                                  | DDMLPWSV                                                                                                              | <u>AESR</u> <u>CHE</u> <u>H</u> <u>F</u> | DS-----                                      | DGIA <u>H</u> <u>L</u> <u>V</u> <u>S</u>                                                                                              | IHDQAENDF                                                                                                                             |                                                                                                                            |
| Spclect-25      | <u>CP</u> <u>F</u> <u>G</u> <u>W</u> <u>S</u> <u>Q</u> <u>S</u> <u>G</u> <u>R</u> <u>S</u> | <u>CYK</u> <u>V</u> <u>S</u>                                                                                          | QMAATYEQ                                 | <u>A</u> <u>A</u> <u>M</u> <u>L</u>          | <u>C</u> <u>S</u> <u>Q</u> <u>Q</u> <u>S</u>                                                                                          | SC----ETGFG <u>G</u> <u>H</u> <u>L</u> <u>V</u> <u>S</u>                                                                              | IITDFEKQQ                                                                                                                  |
| SpPM27          | <u>CK</u> <u>G</u> <u>G</u> <u>W</u> <u>F</u> <u>L</u> <u>I</u> <u>G</u> <u>Q</u> <u>Q</u> | <u>C</u> <u>F</u> <u>K</u> <u>M</u>                                                                                   | SRALKWND                                 | <u>A</u> <u>E</u> <u>L</u> <u>M</u>          | <u>C</u> <u>E</u> <u>Q</u> <u>N</u> <u>A</u>                                                                                          | PC----GTPVL <u>G</u> <u>G</u> <u>V</u> <u>M</u> <u>T</u>                                                                              | I <sup>+</sup> PDIQTSNA                                                                                                    |
| SpClect         | <u>CA</u> <u>P</u> <u>Y</u> <u>F</u> <u>T</u> <u>Y</u> <u>N</u> <u>N</u> <u>G</u> <u>S</u> | <u>CYR</u> <u>M</u> <u>S</u> <u>R</u> <u>L</u> <u>E</u> <u>G</u> <u>M</u> <u>P</u> <u>F</u> <u>A</u> <u>Q</u>         | <u>A</u> <u>N</u> <u>L</u> <u>F</u>      | <u>C</u> <u>G</u> <u>Q</u> <u>C</u> <u>H</u> | PG-----                                                                                                                               | A <u>H</u> <u>L</u> <u>V</u> <u>V</u> <u>I</u> <u>S</u> <u>D</u> <u>A</u> <u>A</u> <u>E</u> <u>H</u> <u>E</u> <u>F</u>                |                                                                                                                            |
| SpSM30a         | <u>CA</u> <u>K</u> <u>F</u> <u>W</u> <u>V</u> <u>Q</u> <u>E</u> <u>G</u> <u>N</u> <u>S</u> | <u>CY</u> <u>L</u> <u>F</u> <u>D</u> <u>N</u> <u>E</u> <u>N</u> <u>G</u> <u>L</u> <u>F</u> <u>Q</u> <u>A</u> <u>A</u> | <u>A</u> <u>N</u> <u>M</u> <u>Y</u>      | <u>C</u> <u>G</u> <u>Q</u> <u>M</u> <u>H</u> | PN-----                                                                                                                               | AS <u>L</u> <u>V</u> <u>T</u> <u>V</u> <u>N</u> <u>S</u> <u>L</u> <u>A</u> <u>E</u> <u>N</u> <u>N</u> <u>F</u>                        |                                                                                                                            |
| SpSM37          | <u>CP</u> <u>P</u> <u>S</u> <u>W</u> <u>V</u> <u>K</u> <u>V</u> <u>E</u> <u>N</u> <u>S</u> | <u>CYR</u> <u>A</u> <u>F</u>                                                                                          | GQLKTYDM                                 | <u>A</u> <u>S</u> <u>Q</u> <u>S</u>          | <u>C</u> <u>K</u> <u>T</u>                                                                                                            | FT-GC----                                                                                                                             | DGISP <u>G</u> <u>H</u> <u>L</u> <u>A</u> <u>A</u> <u>P</u> <u>T</u> <u>T</u> <u>F</u> <u>E</u> <u>R</u> <u>R</u> <u>A</u> |
| Spclect-76      | -----                                                                                      | MTFNE                                                                                                                 | <u>A</u> <u>T</u> <u>F</u> <u>F</u>      | <u>C</u> <u>N</u> <u>R</u> <u>Y</u> <u>G</u> | -----                                                                                                                                 | <u>G</u> <u>S</u> <u>L</u> <u>Y</u> <u>A</u> <u>L</u> <u>D</u> <u>S</u> <u>P</u> <u>S</u> <u>K</u> <u>N</u> <u>R</u> <u>I</u>         |                                                                                                                            |

|                 | 70                                 | 80        | 90 | 100                                                                                                                                                                                                            | 110                                          | 120                                                                                                                  |                                                                         |       |    |   |   |   |                                     |      |   |   |   |   |   |                                                                |
|-----------------|------------------------------------|-----------|----|----------------------------------------------------------------------------------------------------------------------------------------------------------------------------------------------------------------|----------------------------------------------|----------------------------------------------------------------------------------------------------------------------|-------------------------------------------------------------------------|-------|----|---|---|---|-------------------------------------|------|---|---|---|---|---|----------------------------------------------------------------|
| SpEchinoidin-L1 | LSGLHESLRSKLVSTTT                  | -----     | Y  | <u>V</u> <u>W</u> <u>I</u> <u>G</u> <u>L</u>                                                                                                                                                                   | HDQTTEDSWE                                   | <u>W</u> <u>S</u> <u>D</u> <u>G</u> <u>S</u> <u>S</u> <u>L</u> <u>D</u>                                              |                                                                         |       |    |   |   |   |                                     |      |   |   |   |   |   |                                                                |
| SpEchinoidin-L  | LSVLYESIRSKVVTSTT                  | -----     | Y  | <u>V</u> <u>W</u> <u>I</u> <u>G</u> <u>L</u>                                                                                                                                                                   | HDKTTEASWE                                   | <u>W</u> <u>S</u> <u>D</u> <u>G</u> <u>S</u> <u>S</u> <u>Q</u> <u>D</u>                                              |                                                                         |       |    |   |   |   |                                     |      |   |   |   |   |   |                                                                |
| SpEchinoidin    | VTALYESSRKKGDENA                   | -----     | G  | <u>H</u> <u>W</u> <u>F</u> <u>G</u> <u>L</u>                                                                                                                                                                   | HDTSTDGTFE                                   | <u>W</u> <u>T</u> <u>D</u> <u>G</u> <u>T</u> <u>P</u> <u>V</u> <u>D</u>                                              |                                                                         |       |    |   |   |   |                                     |      |   |   |   |   |   |                                                                |
| OwSM20          | V---YTLWQSHLISGLRDS                | DPGVVDRTN | A  | <u>V</u> <u>L</u> <u>I</u> <u>G</u> <u>L</u>                                                                                                                                                                   | NDLATEGTYA                                   | <u>W</u> <u>S</u> <u>D</u> <u>G</u> <u>T</u> <u>L</u> <u>V</u> <u>D</u>                                              |                                                                         |       |    |   |   |   |                                     |      |   |   |   |   |   |                                                                |
| Sp-clect-p      | L---FSYFDTVRNKLPPA                 | IGPIRDE   | R  | <u>L</u> <u>W</u> <u>L</u> <u>G</u> <u>L</u>                                                                                                                                                                   | TDKKQEGFWT                                   | <u>W</u> <u>S</u> <u>D</u> <u>G</u> <u>T</u> <u>N</u> <u>L</u> <u>D</u>                                              |                                                                         |       |    |   |   |   |                                     |      |   |   |   |   |   |                                                                |
| OwSM21          | V---KLLRESSILATPAP                 | -----     | S  | <u>I</u> <u>W</u> <u>T</u> <u>A</u> <u>G</u> <u>N</u> <u>D</u> <u>R</u> <u>I</u> <u>R</u> <u>E</u> <u>G</u> <u>N</u> <u>W</u> <u>Q</u>                                                                         | <u>W</u> <u>A</u> <u>N</u> <u>G</u> <u>Q</u> | <u>P</u> <u>W</u> <u>D</u>                                                                                           |                                                                         |       |    |   |   |   |                                     |      |   |   |   |   |   |                                                                |
| OwSM22          | L---YNLIESVAPELPPA                 | -----     | P  | <u>V</u> <u>W</u> <u>I</u> <u>G</u> <u>L</u>                                                                                                                                                                   | NDIVREGDFR                                   | <u>W</u> <u>P</u> <u>D</u> <u>G</u> <u>T</u> <u>Q</u> <u>Y</u> <u>V</u>                                              |                                                                         |       |    |   |   |   |                                     |      |   |   |   |   |   |                                                                |
| OwSM24          | L---GIYLN <sup>+</sup> SFVPQPPAT   | -----     | D  | <u>F</u> <u>W</u> <u>I</u> <u>G</u> <u>A</u> <u>S</u> <u>D</u> <u>L</u> <u>G</u> <u>L</u> <u>E</u> <u>G</u> <u>R</u> <u>F</u> <u>T</u> <u>N</u> <u>V</u> <u>D</u> <u>G</u> <u>T</u>                            | <u>P</u> <u>V</u> <u>T</u>                   | -----                                                                                                                |                                                                         |       |    |   |   |   |                                     |      |   |   |   |   |   |                                                                |
| Sp-clect-14     | Q---HNWLRYTGGGLN                   | -----     | K  | <u>V</u> <u>W</u> <u>L</u> <u>G</u> <u>L</u>                                                                                                                                                                   | SEKTNN-NYFW                                  | <u>A</u> <u>D</u> <u>G</u> <u>T</u> <u>P</u> <u>L</u> <u>L</u>                                                       |                                                                         |       |    |   |   |   |                                     |      |   |   |   |   |   |                                                                |
| Spclect-13      | Q---HNFLTFTGGANN                   | -----     | K  | <u>V</u> <u>W</u> <u>M</u> <u>G</u> <u>L</u>                                                                                                                                                                   | AERQYNVFW                                    | <u>W</u> <u>A</u> <u>D</u> <u>G</u> <u>T</u> <u>P</u> <u>F</u> <u>R</u>                                              |                                                                         |       |    |   |   |   |                                     |      |   |   |   |   |   |                                                                |
| SpSM29          | Q---HNWLRYTGGGAN                   | -----     | K  | <u>I</u> <u>W</u> <u>M</u> <u>G</u> <u>L</u>                                                                                                                                                                   | AELPSAPRYFW                                  | <u>A</u> <u>D</u> <u>G</u> <u>T</u> <u>E</u> <u>F</u> <u>F</u> <u>F</u> <u>T</u> <u>R</u> <u>N</u> <u>F</u> <u>V</u> |                                                                         |       |    |   |   |   |                                     |      |   |   |   |   |   |                                                                |
| SpSM50          | I---YQLVAGFSQDNQMEN                | -----     | E  | <u>V</u> <u>W</u> <u>L</u> <u>G</u> <u>W</u> <u>N</u> <u>S</u> <u>Q</u> <u>S</u>                                                                                                                               | ---PFFW                                      | <u>E</u> <u>D</u> <u>G</u> <u>T</u> <u>P</u> <u>A</u> <u>Y</u> <u>P</u> <u>N</u> <u>G</u> <u>F</u> <u>A</u> <u>A</u> |                                                                         |       |    |   |   |   |                                     |      |   |   |   |   |   |                                                                |
| SpSM32          | I---YRLVASFSQDNQMER                | -----     | E  | <u>V</u> <u>W</u> <u>L</u> <u>G</u> <u>W</u> <u>N</u> <u>S</u> <u>M</u> <u>N</u>                                                                                                                               | ---PFMW                                      | <u>E</u> <u>N</u> <u>G</u> <u>A</u> <u>P</u> <u>A</u> <u>P</u> <u>H</u> <u>G</u> <u>F</u> <u>S</u> <u>A</u>          |                                                                         |       |    |   |   |   |                                     |      |   |   |   |   |   |                                                                |
| SpAggrecan      | I---FDIFNSANGDHGDL                 | DI        | T  | N                                                                                                                                                                                                              | P                                            | G                                                                                                                    | T                                                                       | L     | P  | T | G | M | <u>W</u> <u>T</u> <u>G</u> <u>L</u> | HQEV | R | D | G | P | W | <u>W</u> <u>S</u> <u>D</u> <u>G</u> <u>S</u> <u>S</u> <u>N</u> |
| Spclect-25      | V---TDILNFNQMARN                   | -----     | E  | <u>T</u> <u>W</u> <u>L</u> <u>G</u> <u>L</u>                                                                                                                                                                   | --RTYNG                                      | PLR                                                                                                                  | <u>W</u> <u>A</u> <u>S</u> <u>G</u> <u>E</u> <u>P</u> <u>L</u> <u>N</u> | ----- | PA |   |   |   |                                     |      |   |   |   |   |   |                                                                |
| SpPM27          | V---INHLKSL <sup>+</sup> SSTAMAIDI | -----     | P  | <u>F</u> <u>W</u> <u>T</u> <u>G</u> <u>L</u>                                                                                                                                                                   | HNKRYEG                                      | W                                                                                                                    | <u>W</u> <u>P</u> <u>A</u> <u>G</u> <u>Q</u> <u>P</u> <u>L</u> <u>R</u> | ----- |    |   |   |   |                                     |      |   |   |   |   |   |                                                                |
| SpClect         | L---YNNFYGFEP                      | -----     | E  | <u>V</u> <u>W</u> <u>V</u> <u>G</u> <u>L</u>                                                                                                                                                                   | FFNSTTLAWE                                   | <u>W</u> <u>V</u> <u>N</u> <u>G</u> <u>E</u> <u>P</u> <u>A</u>                                                       | -----                                                                   |       |    |   |   |   |                                     |      |   |   |   |   |   |                                                                |
| SpSM30a         | L---YEWAVRMMVEPE                   | -----     | P  | <u>V</u> <u>W</u> <u>I</u> <u>G</u> <u>L</u>                                                                                                                                                                   | HA-GPMGQWQ                                   | <u>W</u> <u>Y</u> <u>S</u> <u>G</u> <u>E</u> <u>P</u> <u>V</u> <u>T</u>                                              | -----                                                                   |       |    |   |   |   |                                     |      |   |   |   |   |   |                                                                |
| SpSM37          | VKIRFDLLRPIGGNRIGEG                | QRLRPS    | N  | <u>V</u> <u>W</u> <u>M</u> <u>G</u> <u>F</u> <u>R</u>                                                                                                                                                          | LGQGANS                                      | <u>W</u> <u>D</u> <u>S</u> <u>T</u> <u>E</u> <u>Q</u> <u>Y</u> <u>D</u>                                              | -----                                                                   | NLL   |    |   |   |   |                                     |      |   |   |   |   |   |                                                                |
| Spclect-76      | M---LSYLT <sup>+</sup> TVFGQRRQ    | -----     | K  | <u>F</u> <u>W</u> <u>T</u> <u>G</u> <u>F</u> <u>Y</u> <u>K</u> <u>A</u> <u>E</u> <u>N</u> <u>A</u> <u>L</u> <u>G</u> <u>W</u> <u>R</u> <u>W</u> <u>S</u> <u>T</u> <u>G</u> <u>S</u> <u>T</u> <u>S</u> <u>Q</u> | -----                                        |                                                                                                                      |                                                                         |       |    |   |   |   |                                     |      |   |   |   |   |   |                                                                |

|                 | 130                                                                                                                                                                                                                                                                                                          | 140 | 150 | 160 | 170 | 180 |
|-----------------|--------------------------------------------------------------------------------------------------------------------------------------------------------------------------------------------------------------------------------------------------------------------------------------------------------------|-----|-----|-----|-----|-----|
| SpEchinoidin-L1 | Y-EI <b>W</b> EP-- <b>G</b> Q <b>P</b> SSHN---G--N <b>Q</b> D <b>C</b> V <b>M</b> FFSS-----N <b>K</b> Y <b>K</b> <b>W</b> NDL <b>A</b> <b>C</b>                                                                                                                                                              |     |     |     |     |     |
| SpEchinoidin-L  | Y-EI <b>W</b> AS-- <b>G</b> Q <b>P</b> NNYG---G--N <b>Q</b> D <b>C</b> G <b>V</b> FSST-----S <b>E</b> Y <b>K</b> <b>W</b> ND <b>F</b> <b>A</b> <b>C</b>                                                                                                                                                      |     |     |     |     |     |
| SpEchinoidin    | F-TH <b>W</b> KP-- <b>G</b> Q <b>P</b> DNYPNHVG--N <b>E</b> N <b>C</b> G <b>V</b> MRSH-----S <b>G</b> S <b>Q</b> <b>W</b> KD <b>G</b> <b>R</b> <b>C</b>                                                                                                                                                      |     |     |     |     |     |
| OwSM20          | FGPY <b>W</b> KP--D <b>Q</b> <b>P</b> NNYG---G--N <b>Q</b> D <b>C</b> SS <b>M</b> H <b>K</b> RDG-----T <b>D</b> D <b>G</b> <b>W</b> ND <b>I</b> <b>V</b> <b>C</b>                                                                                                                                            |     |     |     |     |     |
| Sp-clect-p      | Y-AN <b>W</b> RA-- <b>G</b> E <b>P</b> NNNG---G--N <b>E</b> D <b>Y</b> A <b>Q</b> MS <b>V</b> EIN-----H <b>E</b> G <b>L</b> <b>W</b> FD <b>M</b> <b>T</b> <b>D</b>                                                                                                                                           |     |     |     |     |     |
| OwSM21          | Y-AN <b>W</b> EQ-- <b>G</b> Q <b>P</b> NN <b>Q</b> G---G--A <b>E</b> N <b>C</b> L <b>R</b> F <b>P</b> G <b>Q</b> R-----S <b>V</b> D <b>Q</b> <b>W</b> DD <b>F</b> <b>D</b> <b>C</b>                                                                                                                          |     |     |     |     |     |
| OwSM22          | F-K <b>N</b> <b>W</b> ER-- <b>G</b> H <b>P</b> NN <b>Q</b> G-----N <b>S</b> D <b>C</b> V <b>A</b> M <b>P</b> G <b>E</b> R-----P <b>G</b> A <b>G</b> <b>W</b> V <b>S</b> M <b>N</b> <b>C</b>                                                                                                                  |     |     |     |     |     |
| OwSM24          | F-T <b>N</b> <b>W</b> AQ-- <b>G</b> Q <b>P</b> D <b>N</b> G <b>A</b> Q <b>S</b> T <b>G</b> Q--P <b>E</b> N <b>C</b> V <b>M</b> Y <b>G</b> G-----E <b>T</b> K <b>L</b> <b>W</b> S <b>D</b> A <b>S</b> <b>C</b>                                                                                                |     |     |     |     |     |
| Sp-clect-14     | W-N <b>K</b> <b>W</b> KI--D <b>Q</b> <b>P</b> Q <b>L</b> NA-----H <b>I</b> Q <b>G</b> V <b>H</b> T <b>F</b> D <b>N</b> M <b>V</b> -----D <b>M</b> T <b>W</b> V <b>T</b> S <b>F</b> <b>Y</b>                                                                                                                  |     |     |     |     |     |
| Spclect-13      | W-N <b>L</b> F <b>K</b> P--D <b>Q</b> <b>P</b> Q <b>Q</b> NH-----H <b>I</b> D <b>G</b> V <b>F</b> T <b>F</b> D <b>N</b> Y-----P <b>Y</b> Q <b>T</b> <b>W</b> V <b>T</b> S <b>S</b> H                                                                                                                         |     |     |     |     |     |
| SpSM29          | F-N <b>R</b> F <b>K</b> P--D <b>Q</b> <b>P</b> Q <b>Q</b> NA-----H <b>R</b> Q <b>A</b> V <b>H</b> S <b>F</b> N <b>N</b> R-----P <b>D</b> N <b>S</b> <b>W</b> V <b>T</b> T <b>S</b> V                                                                                                                         |     |     |     |     |     |
| SpSM50          | F <b>S</b> S <b>S</b> <b>W</b> P <b>V</b> N <b>P</b> Q <b>N</b> P <b>M</b> S <b>G</b> P-----P <b>G</b> R <b>A</b> P <b>V</b> M <b>K</b> R <b>Q</b> N <b>P</b> P <b>V</b> R <b>P</b> G <b>Q</b> G <b>R</b> Q <b>I</b> P <b>Q</b> G--V <b>G</b> P <b>Q</b> <b>W</b> E <b>A</b> V <b>E</b> V                    |     |     |     |     |     |
| SpSM32          | F <b>D</b> S <b>G</b> <b>W</b> P <b>V</b> N <b>T</b> R <b>N</b> P <b>F</b> G <b>M</b> P-----P <b>G</b> F <b>A</b> P <b>V</b> M <b>R</b> R <b>E</b> L <b>G</b> T <b>I</b> P <b>G</b> R <b>Q</b> G <b>P</b> N <b>R</b> R <b>M</b> I <b>P</b> A <b>S</b> Q <b>G</b> P <b>V</b> <b>W</b> Q <b>V</b> A <b>E</b> L |     |     |     |     |     |
| SpAggrecan      | Y-TH <b>W</b> LP-- <b>G</b> Q <b>P</b> D <b>N</b> G <b>Y</b> H <b>A</b> R <b>G</b> R <b>L</b> N <b>E</b> D <b>C</b> V <b>I</b> I <b>W</b> R <b>N</b> D <b>D</b> N <b>G</b> S <b>E</b> -----S <b>T</b> R <b>Q</b> <b>W</b> D <b>D</b> I <b>G</b> <b>C</b>                                                     |     |     |     |     |     |
| Spclect-25      | L <b>T</b> N <b>P</b> <b>W</b> H <b>P</b> -- <b>G</b> N <b>P</b> M <b>R</b> G-----P <b>N</b> M <b>C</b> T <b>V</b> S-----F <b>Q</b> N <b>R</b> <b>W</b> A <b>T</b> R <b>N</b> <b>C</b>                                                                                                                       |     |     |     |     |     |
| SpPM27          | F-V <b>N</b> <b>W</b> A <b>P</b> --R <b>E</b> <b>P</b> N <b>N</b> Q <b>L</b> L <b>D</b> Q <b>Q</b> --H <b>S</b> Y <b>C</b> A <b>R</b> M <b>N</b> -----R <b>M</b> G <b>Q</b> <b>W</b> Y <b>V</b> V <b>R</b> <b>C</b>                                                                                          |     |     |     |     |     |
| SpClect         | L <b>N</b> V <b>P</b> <b>W</b> E <b>P</b> F <b>Y</b> <b>G</b> E <b>P</b> L <b>V</b> T <b>H</b> -----Q <b>G</b> A <b>A</b> M <b>M</b> Y <b>V</b> S <b>E</b> V <b>I</b> D <b>Q</b> Q <b>T</b> T <b>L</b> K <b>Y</b> G-----Y <b>G</b> I <b>E</b> V <b>S</b> D <b>Y</b> L <b>V</b>                               |     |     |     |     |     |
| SpSM30a         | Y-T <b>N</b> <b>W</b> ER <b>M</b> -T <b>A</b> P <b>M</b> A <b>E</b> P-----G <b>L</b> G <b>A</b> M <b>I</b> F <b>D</b> A <b>D</b> I <b>I</b> A <b>Q</b> M <b>F</b> N <b>N</b> Q <b>V</b> E-----I <b>T</b> P <b>Q</b> <b>W</b> V <b>P</b> E <b>Q</b> A                                                         |     |     |     |     |     |
| SpSM37          | L <b>D</b> Q <b>H</b> <b>W</b> G <b>P</b> --N <b>R</b> <b>P</b> N <b>M</b> P <b>G</b> Q <b>R</b> P <b>Q</b> A <b>Q</b> A <b>F</b> D <b>C</b> M <b>T</b> L <b>P</b> G <b>Q</b> M <b>Q</b> M <b>N</b> G-----A <b>V</b> Q <b>K</b> <b>W</b> G <b>H</b> I <b>A</b> <b>C</b>                                      |     |     |     |     |     |
| Spclect-76      | Y-T <b>D</b> <b>W</b> E <b>A</b> -- <b>G</b> K <b>P</b> A <b>T</b> T <b>N</b> -----E <b>A</b> I <b>G</b> A <b>V</b> A <b>W</b> G-----G <b>T</b> H <b>H</b> <b>W</b> S <b>D</b> T <b>W</b> Q                                                                                                                  |     |     |     |     |     |

|                 | 190                                                                                              |
|-----------------|--------------------------------------------------------------------------------------------------|
| SpEchinoidin-L1 | D <b>S</b> D <b>G</b> D <b>T</b> A <b>Y</b> H <b>G</b> S <b>A</b> Y <b>V</b> <b>C</b> K <b>L</b> |
| SpEchinoidin-L  | D <b>S</b> D <b>G</b> D <b>S</b> P <b>H</b> H <b>A</b> T <b>A</b> Y <b>V</b> <b>C</b> K <b>L</b> |
| SpEchinoidin    | V <b>Q</b> P <b>S</b> D <b>S</b> A <b>I</b> H <b>Y</b> --F <b>I</b> <b>C</b> K <b>T</b>          |
| OwSM20          | G <b>A</b> G <b>D</b> E <b>G</b> P <b>L</b> P---Y <b>I</b> <b>C</b> K <b>I</b>                   |
| Sp-clect-p      | A <b>H</b> G <b>D</b> Y <b>I</b> V <b>H</b> ---Y <b>I</b> <b>C</b> K <b>M</b>                    |
| OwSM21          | L <b>T</b> E <b>L</b> P-----Y <b>I</b> <b>C</b> H <b>L</b>                                       |
| OwSM22          | M <b>E</b> E <b>F</b> A-----Y <b>I</b> <b>C</b> K <b>M</b>                                       |
| OwSM24          | A <b>M</b> M <b>P</b> -----Y <b>I</b> <b>C</b> M <b>M</b>                                        |
| Sp-clect-14     | K <b>T</b> E <b>M</b> S-----F <b>I</b> <b>C</b> Q <b>Y</b>                                       |
| Spclect-13      | E <b>T</b> Q <b>M</b> S-----F <b>T</b> <b>C</b> Q <b>Y</b>                                       |
| SpSM29          | E <b>T</b> E <b>V</b> S-----F <b>I</b> <b>C</b> Q <b>Y</b>                                       |
| SpSM50          | T <b>A</b> M <b>R</b> A-----F <b>V</b> <b>C</b> E <b>V</b>                                       |
| SpSM32          | T <b>G</b> P <b>T</b> H <b>A</b> -----F <b>V</b> <b>C</b> E <b>V</b>                             |
| SpAggrecan      | D <b>I</b> Q <b>G</b> G <b>M</b> P-----Y <b>V</b> <b>C</b> K <b>M</b>                            |
| Spclect-25      | N <b>M</b> R <b>R</b> Q-----F <b>I</b> <b>C</b> E <b>M</b>                                       |
| SpPM27          | D <b>E</b> P <b>M</b> Y-----F <b>A</b> <b>C</b> S <b>M</b>                                       |
| SpClect         | S <b>E</b> L <b>G</b> E <b>E</b> P <b>L</b> P---F <b>I</b> <b>C</b> E <b>Y</b>                   |
| SpSM30a         | I <b>N</b> D <b>R</b> H <b>A</b> -----L <b>I</b> <b>C</b> E <b>Y</b>                             |
| SpSM37          | N <b>M</b> Q <b>A</b> A-----Y <b>M</b> <b>C</b> E <b>I</b>                                       |
| Spclect-76      | D <b>E</b> P <b>L</b> S <b>A</b> S <b>F</b> A---F <b>I</b> <b>C</b> Q <b>A</b>                   |
